# Supplementary material for: Genetic Analysis for the Flag Leaf Heterosis of a Super-Hybrid Rice WFYT025 Combination Using RNA-Seq
Source: MDPI journal article supplement (doi:10.3390/plants12132496), 2023-06-29

## Supplementary data

### Supplementary Figures and Tables Captions

**Supplementary Table S1.** Summary of reads quality control.

| Sample   | Raw Data Read | Valid Data Read | Q20%  | Q30%  |
|----------|---------------|-----------------|-------|-------|
| WFB1YE1  | 58067824      | 51827564        | 99.97 | 96.90 |
| WFB1YE2  | 55856602      | 50440052        | 99.97 | 96.42 |
| WFB1YE3  | 49093548      | 44323472        | 99.97 | 96.93 |
| WFB10YE1 | 55154582      | 48373938        | 99.97 | 96.89 |
| WFB10YE2 | 32577058      | 29566054        | 99.97 | 97.09 |
| WFB10YE3 | 57707296      | 53939666        | 99.97 | 96.82 |
| CH1YE1   | 47223226      | 43972676        | 99.97 | 96.90 |
| CH1YE2   | 50148850      | 47276426        | 99.97 | 96.38 |
| CH1YE3   | 59521130      | 56657380        | 99.97 | 96.43 |
| CH10YE1  | 49924152      | 47693980        | 99.96 | 95.71 |
| CH10YE2  | 56697348      | 53102578        | 99.96 | 96.23 |
| CH10YE3  | 51910576      | 49064482        | 99.96 | 96.10 |
| WFY1YE1  | 42521008      | 39987756        | 99.97 | 96.29 |
| WFY1YE2  | 42407886      | 38573182        | 99.97 | 95.61 |
| WFY1YE3  | 49399744      | 44670540        | 99.97 | 95.66 |
| WFY10YE1 | 59642288      | 54054670        | 99.96 | 96.48 |
| WFY10YE2 | 58586170      | 53489318        | 99.96 | 96.37 |
| WFY10YE3 | 59388316      | 57894440        | 99.95 | 95.66 |
| WFB1YM1  | 41877940      | 37466360        | 99.96 | 95.28 |
| WFB1YM2  | 37675788      | 34596514        | 99.96 | 95.32 |
| WFB1YM3  | 43931940      | 40412444        | 99.96 | 95.25 |
| WFB10YM1 | 55179068      | 48185880        | 99.96 | 96.55 |
| WFB10YM2 | 37529196      | 33435912        | 99.97 | 96.20 |
| WFB10YM3 | 36929212      | 32208332        | 99.96 | 95.35 |
| CH1YM1   | 37453408      | 31809752        | 99.96 | 95.95 |
| CH1YM2   | 49902748      | 44269166        | 99.96 | 96.03 |
| CH1YM3   | 39974474      | 34311360        | 99.96 | 95.72 |
| CH10YM1  | 42010238      | 36958032        | 99.97 | 95.77 |
| CH10YM2  | 48782678      | 43370946        | 99.96 | 96.03 |
| CH10YM3  | 49215802      | 43682886        | 99.96 | 96.08 |
| WFY1YM1  | 58915542      | 52942812        | 99.96 | 96.32 |
| WFY1YM2  | 35801982      | 31728748        | 99.96 | 95.16 |
| WFY1YM3  | 38811202      | 32672228        | 99.96 | 95.73 |
| WFY10YM1 | 45758222      | 39934752        | 99.96 | 95.85 |
| WFY10YM2 | 49112104      | 40312014        | 99.96 | 95.47 |
| WFY10YM3 | 41302046      | 36012804        | 99.96 | 95.36 |

CH, WFY and WFB represent CHT025, WFYT025 and WFB, respectively. E and M represent early and middle. Y represent flag leaf. 1, 10 represent 1 DPA and 10 DPA. For example, WFB1YE1 represent in the early rice environment, the flag leaf of WFB at 1 DPA.

**Supplementary Table S2.** Primers used in this study.

| Gene ID             | Forward primer          | Reverse primer         |
|---------------------|-------------------------|------------------------|
| <i>OS09G0555500</i> | GCAATCTGGGCGATATACGTGTG | TGTACCTCGACTTCGTTAGGTC |
| <i>OS04G0578400</i> | TGCCGATGACCGAGATGTTT    | CATGCCGAACAGCGTAATCC   |
| <i>OS03G0592500</i> | TATGGACCTGACCGTCCCAA    | CTTCACCCCGTTCTTGGACA   |
| <i>OS03G0856700</i> | CGGCTTCTTCCTGGTGGTTA    | GTCGTTGCGCTGGAAGAATC   |
| <i>OS04G0611800</i> | TACAAGAGGATTCGGCGTGG    | CATCCCCATGGCAAGGCTAA   |
| <i>OS01G0580500</i> | GGAGGTGAAGAGCTTCGTGT    | AGTAGGTGGCCTCCCAGTC    |
| <i>OS01G0656200</i> | CAGCAGGTGGCAGGGTTATC    | GATACCACATCCCACAGCCC   |
| <i>OS01G0841600</i> | CCTTCACTGGCGAGATCAGT    | GGTCTCACCAATGCAAGCAA   |
| <i>OS02G0171100</i> | TCGAGTGGCGAGAAGACAAA    | CCCCAAGGAATATCTGCTGGA  |
| <i>Os11g0171300</i> | TCCTTGCCATGGATGAGTCG    | GAGACCTTGGCACCATGACT   |
| <i>Os06g0133800</i> | GACGAGGTCATGCGGTACAA    | GATGGCCTGGAGTCTTGCTT   |
| <i>Os08g0434300</i> | AATTGCTGCCGAGGTTCTGA    | CATGACCACCGACAACCTGGA  |

**Supplementary Figure S1** Comparison of the log<sub>2</sub> (FC) of 12 randomly selected transcripts using RNA-Seq and qRT-PCR. **A-C:** In the early rice environment, compare 1 DPA and 10 DPA about CHT025, WFB and WFYT025, respectively. **D-E:** In the middle rice environment, compare 1 DPA and 10 DPA about CHT025, WFB and WFYT025, respectively.

A.

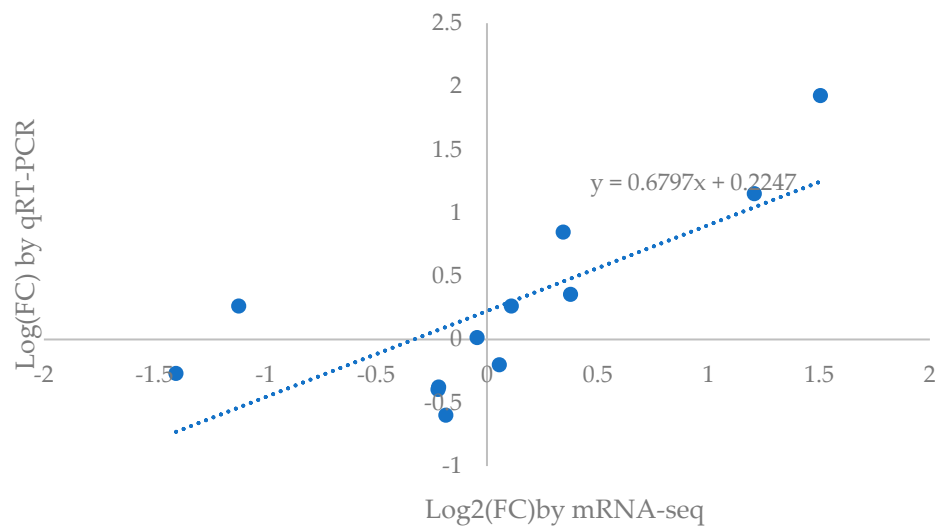

B

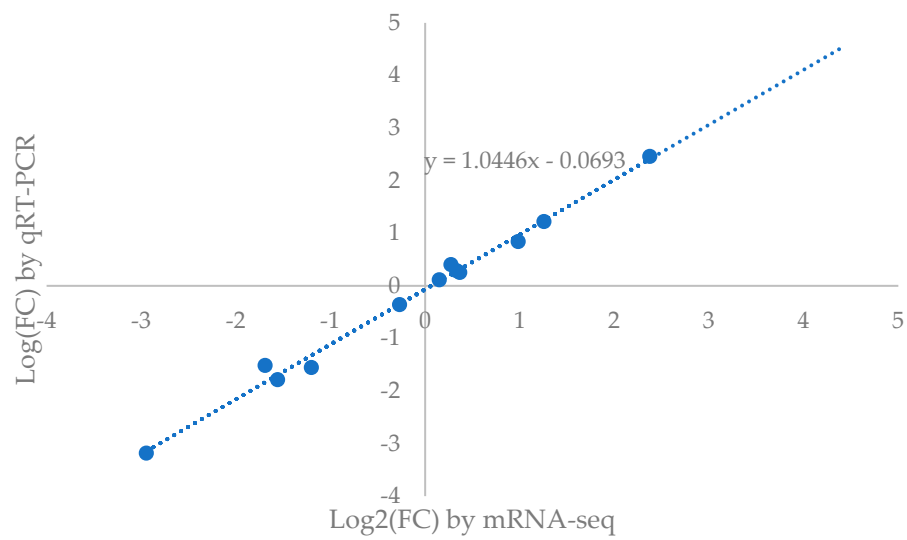

C

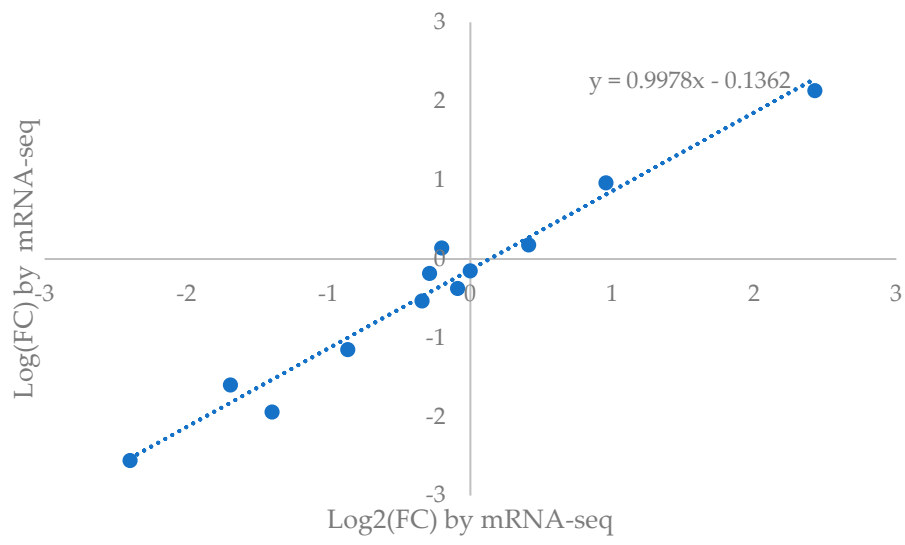

D

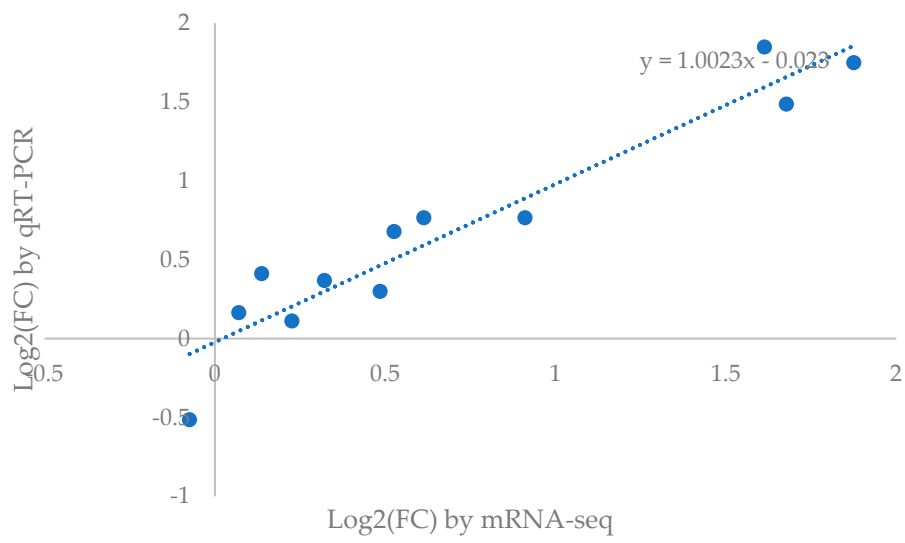

E

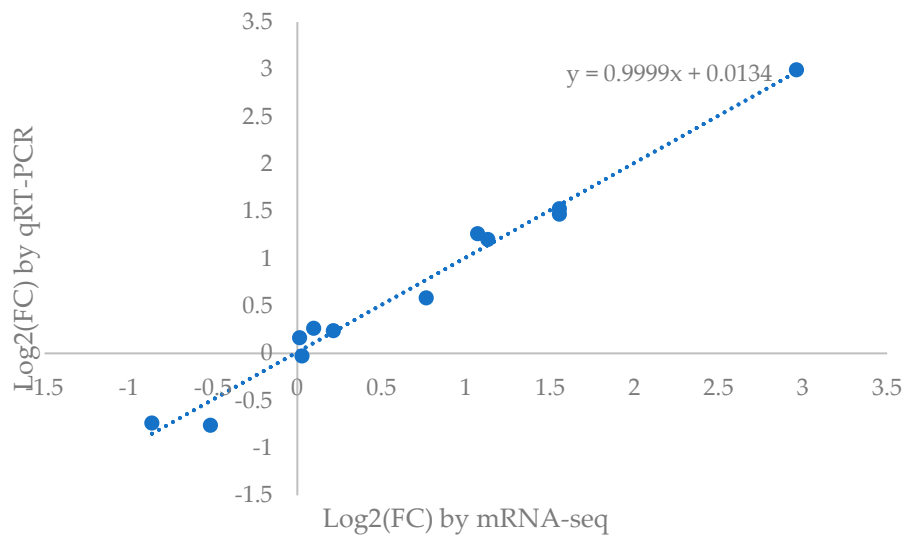

F

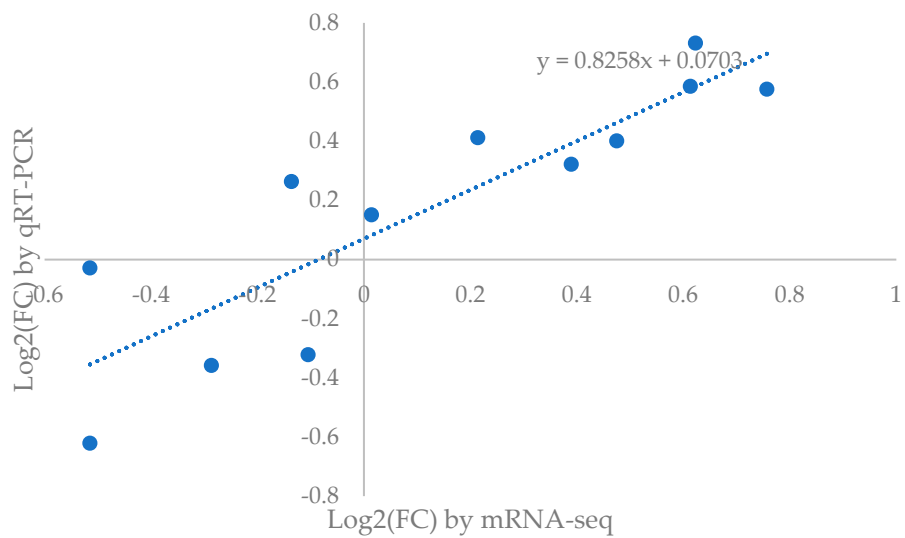

### Supplementary Figure S2 Gene ontology (GO) enrichment analysis of DEGs(A)

GO enrichment analysis of DEGs at 1 DPA and 10 DPA under the environment of early rice in WFYT025. **(B)** GO enrichment analysis of DEGs at 1 DPA and 10 DPA under the environment of middle rice in CHT025. **(C)** GO enrichment analysis of DEGs at 1 DPA and 10 DPA under the environment of middle rice in WFB. **(D)** GO enrichment analysis of DEGs at 1 DPA and 10 DPA under the

environment of middle rice in WFYT025.

A.

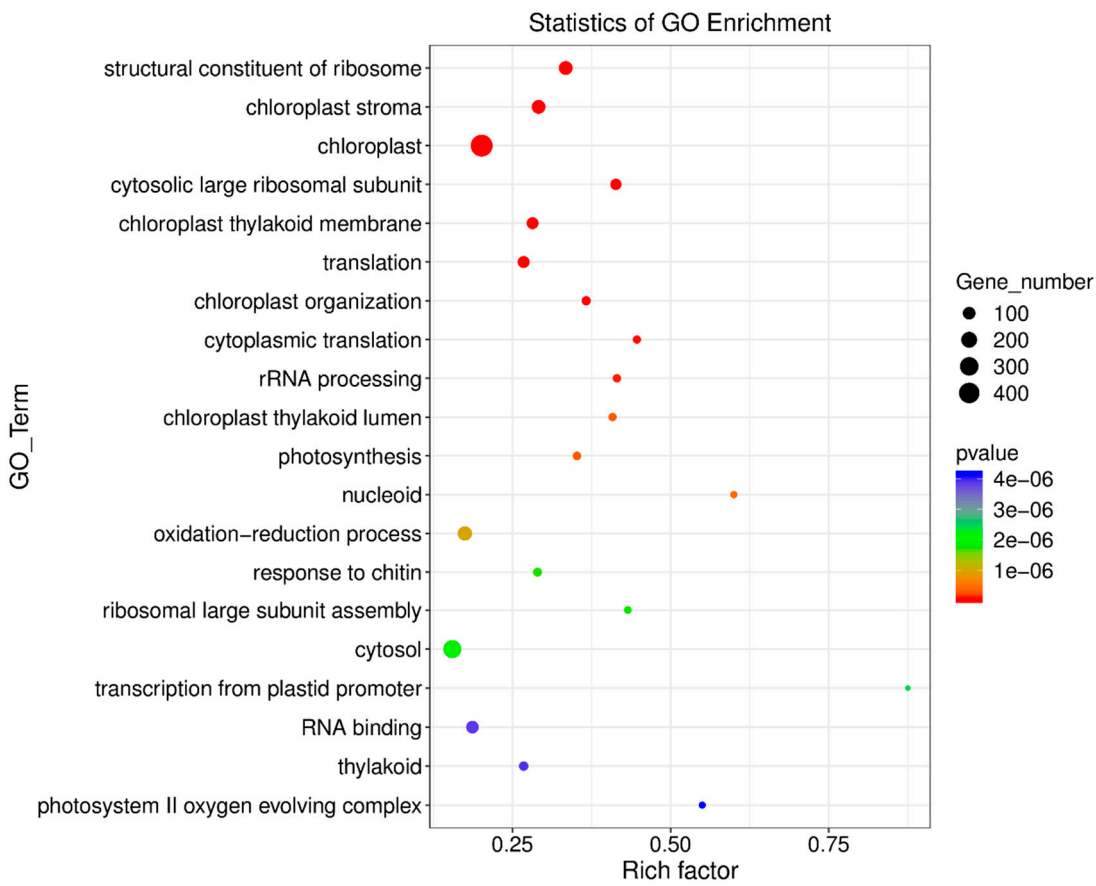

B

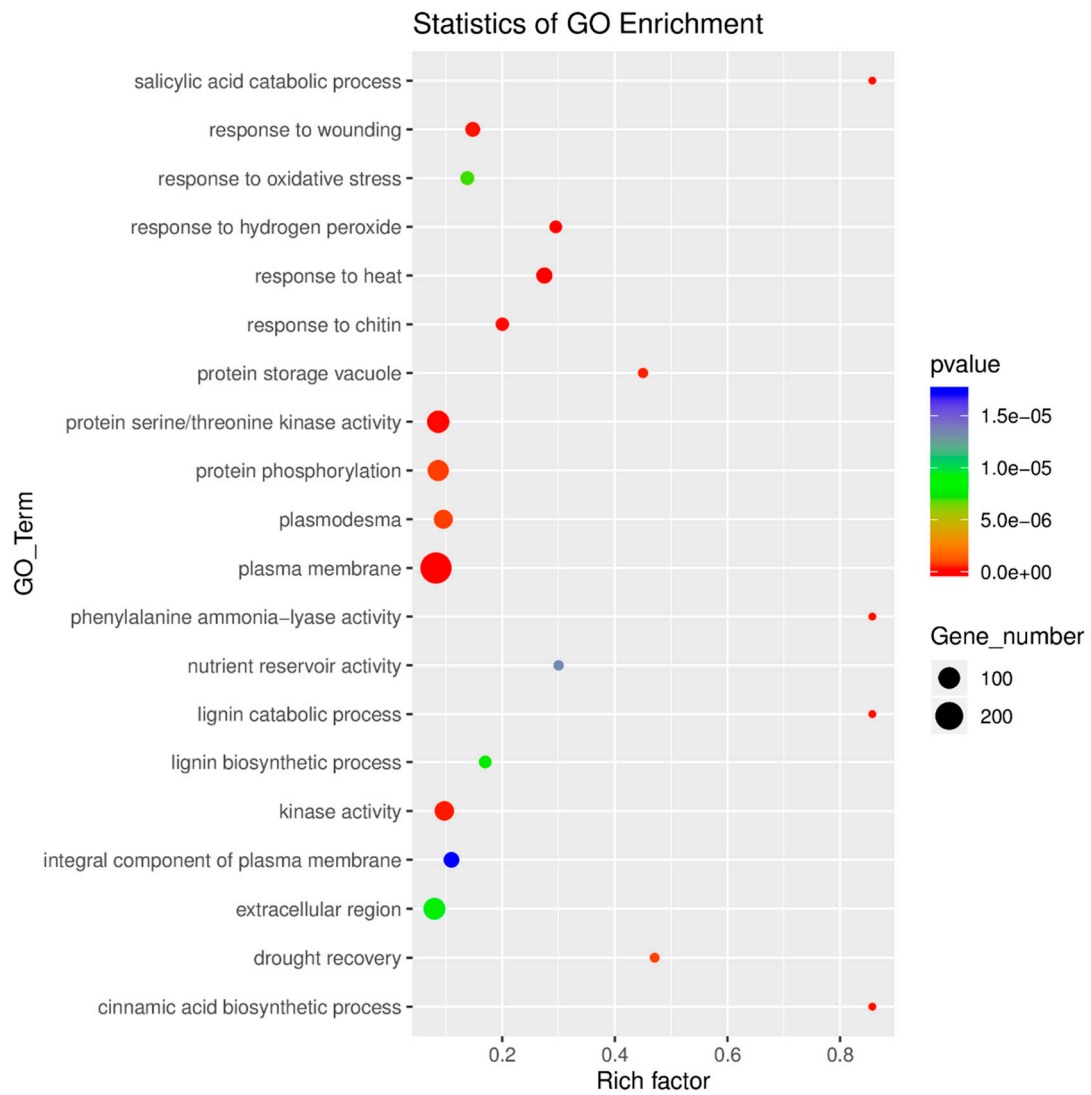

C

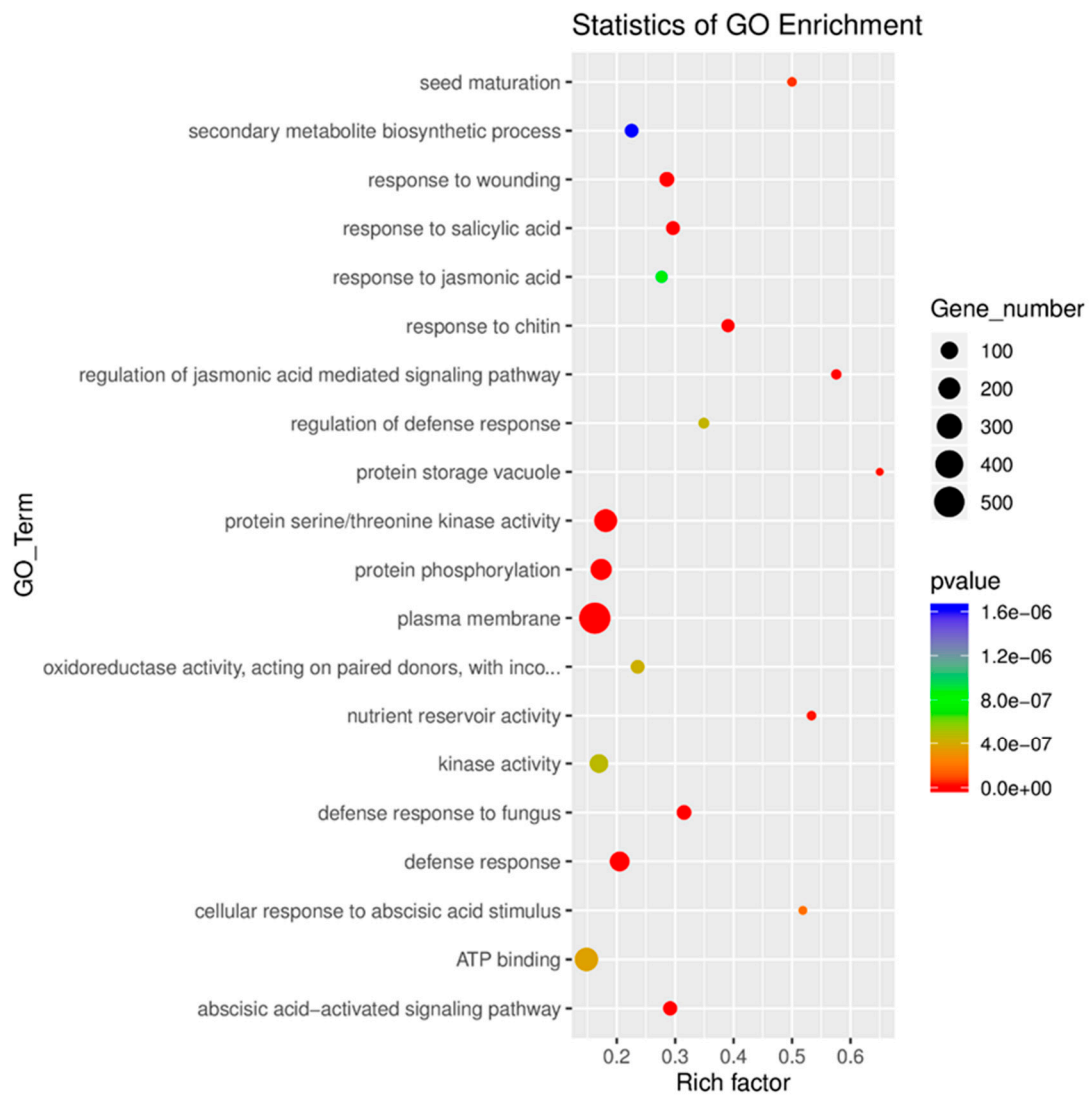



D

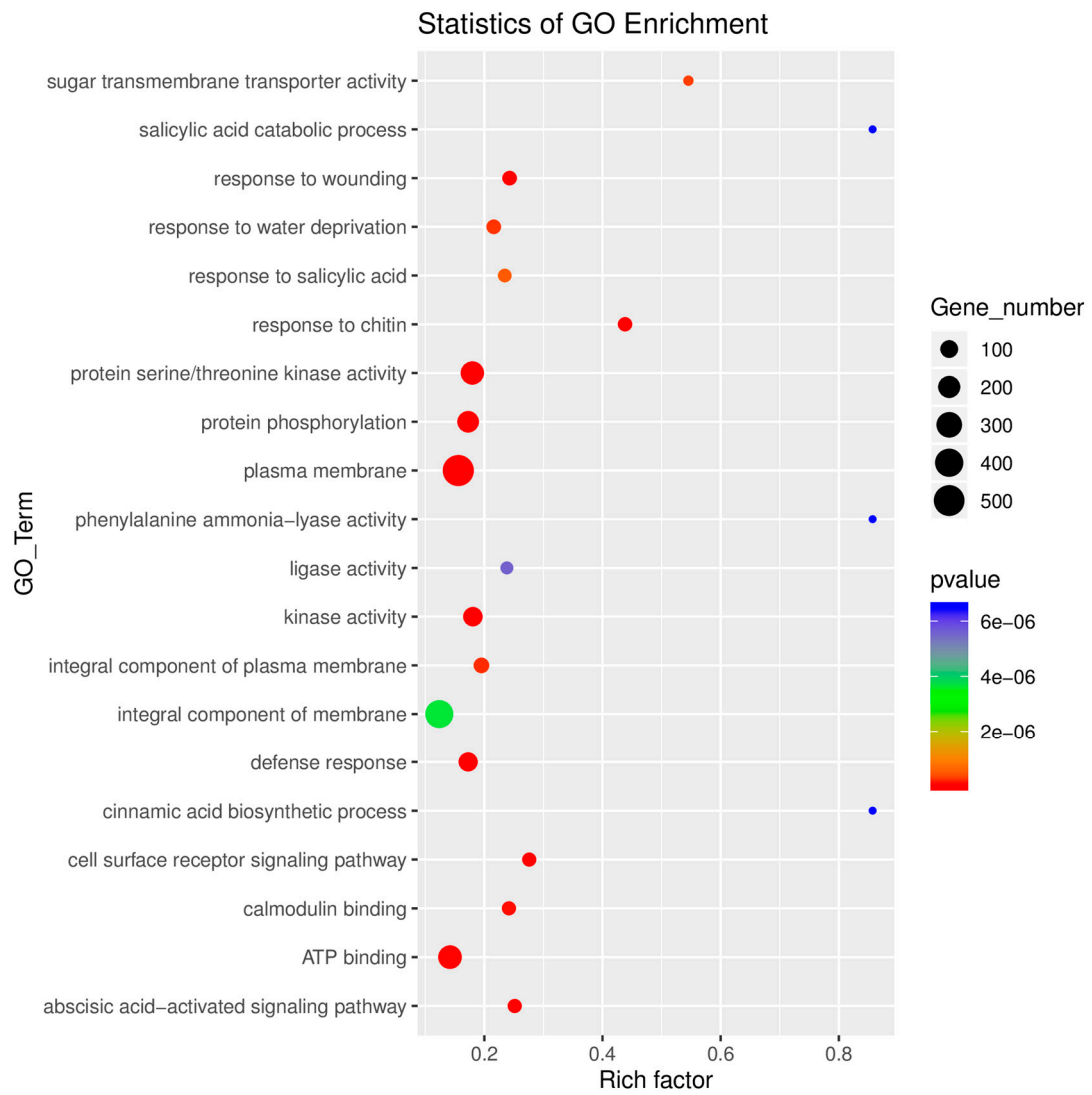

**Supplementary Figure S3** KEGG analysis of DEGs between WFYT025 in the environment of early rice. That showed the top 20 most represented categories and the number of transcripts predicted to belong to each category.

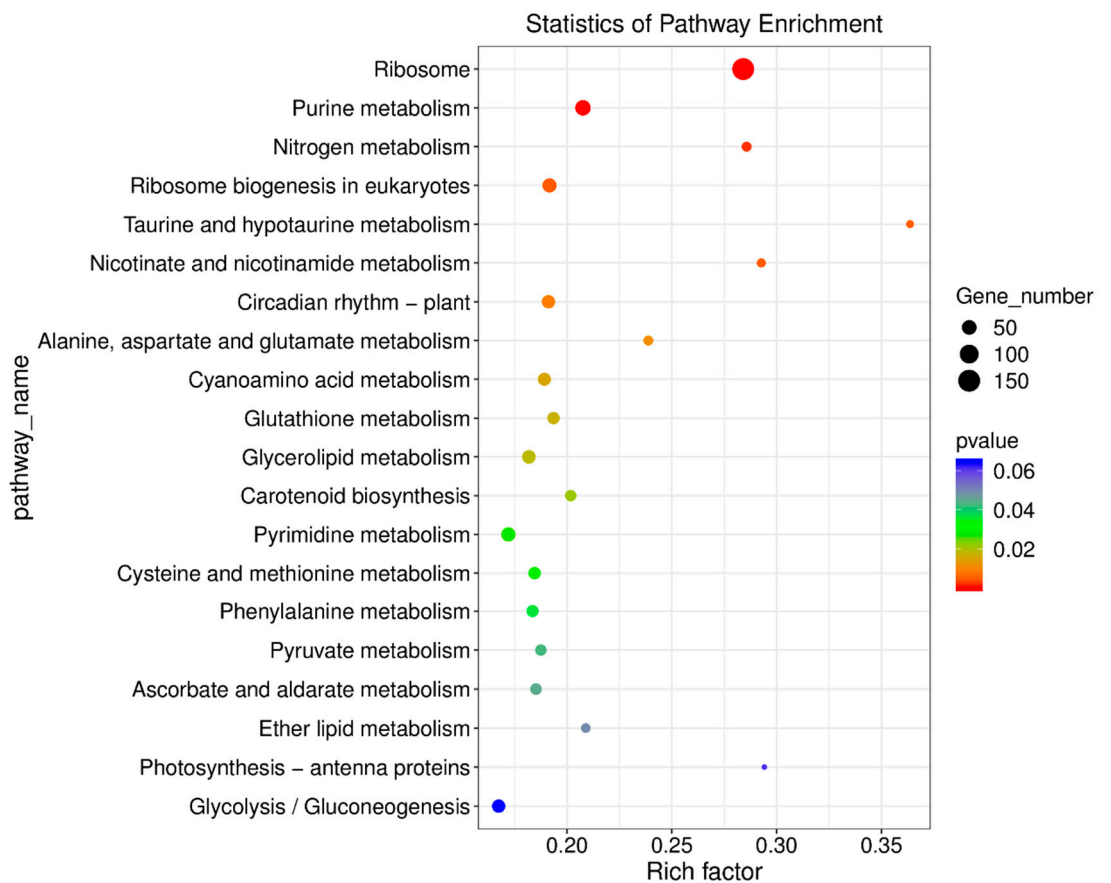

**Supplementary Figure S4** Correlation between gene expression profile of co-expression module and three phenotypic data (TGW; Length; Width). The legend on the right shows the correlation coefficients, with positive correlation in red and negative correlation in blue. Since the aim is to find genes related to seed development, the focus is on the co-expression module with high correlation with TGW (module color is midnightblue, the gene expression profile in this module is moderately negatively correlated with the TGW phenotype)

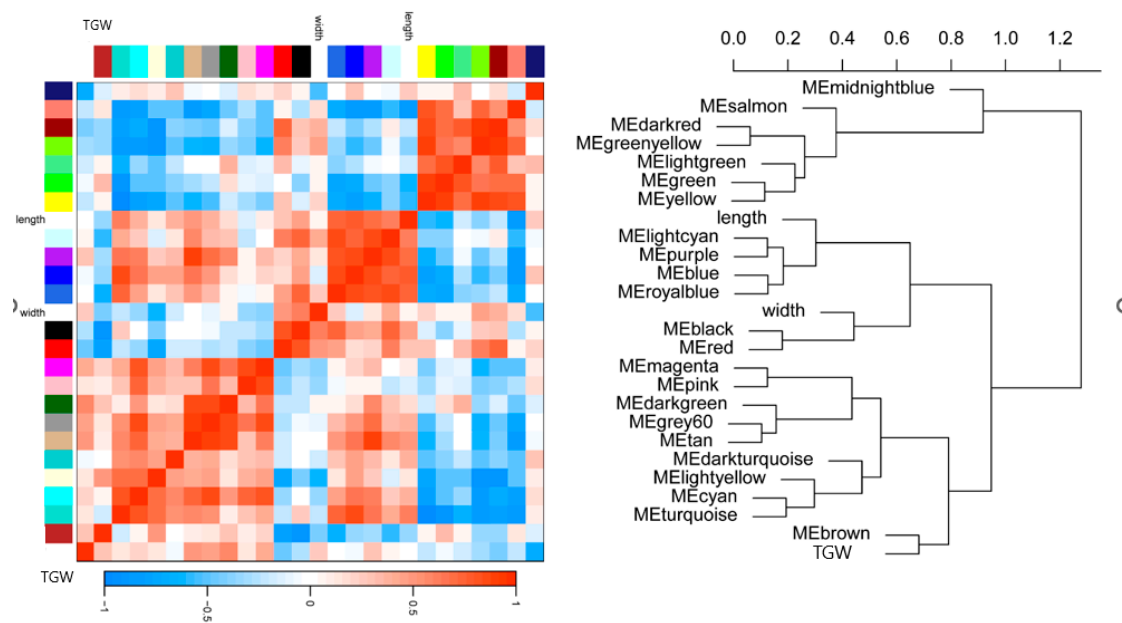

**Supplementary Figure S5** Is the overall gene expression profile of the co-expression module MidnightBlue, which has the highest correlation with TGW.

There are 106 genes in this co-expression module. The graph is divided into three parts, the upper part is the expression heat map of the genes in the co-expression module. The middle part shows the relative expression of the eigengene in the module. The lower part shows the TGW phenotype values of the samples.

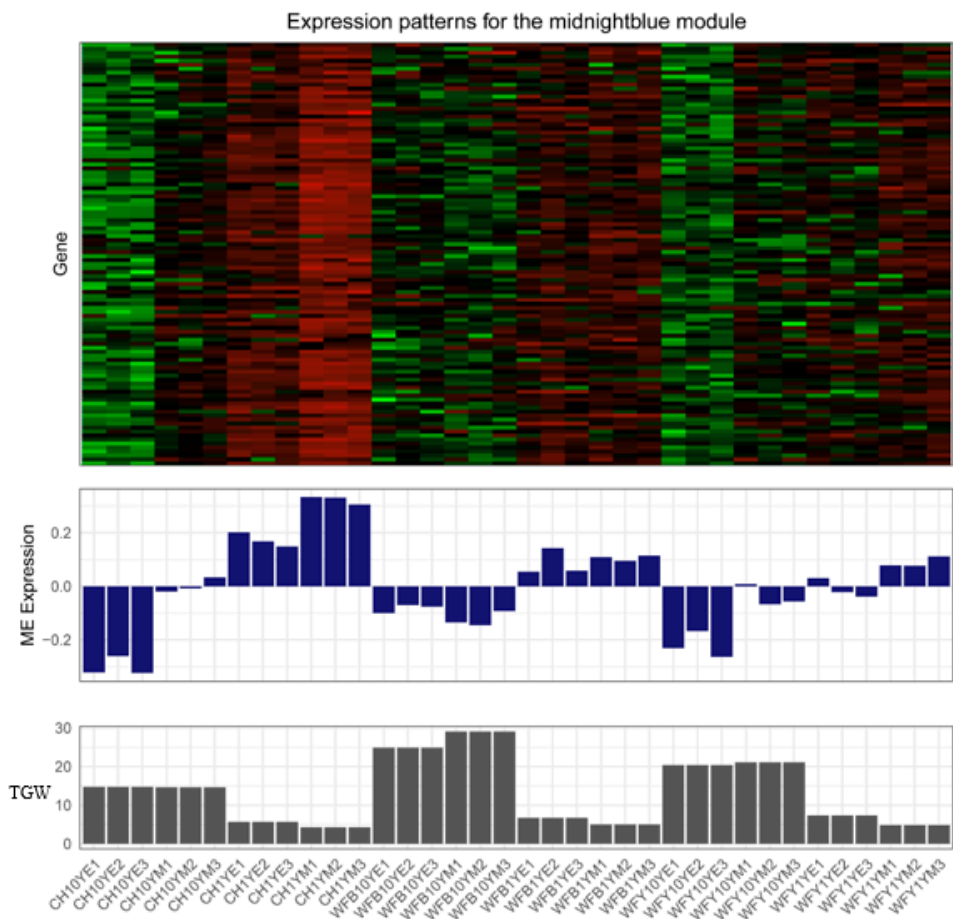

Supplement: s1 [file s1]
